# Supplementary material for: Integrated Cr and S poisoning of a La0.6Sr0.4Co0.2Fe0.8O3−δ (LSCF) cathode for solid oxide fuel cells
Source: Royal Society of Chemistry journal article supplement (doi:10.1039/d0ra09239h), 2020-12-22
Supplement: d0ra09239h1.pdf [file d0ra09239h1.pdf]

## ***Integrated Cr and S poisoning of $\text{La}_{0.6}\text{Sr}_{0.4}\text{Co}_{0.2}\text{Fe}_{0.8}\text{O}_{3-\delta}$ (LSCF)***

### ***cathode of solid oxide fuel cells***

Cheng Cheng Wang<sup>a,b,\*</sup>, Mortaza Gholizadeh<sup>c</sup>, Bingxue Hou<sup>d</sup>, Xincan Fan<sup>a,\*</sup>

<sup>a</sup>*Shen Zhen Polytechnic, Shenzhen, 518055, China*

<sup>b</sup>*Fuels and Energy Technology Institute & Department of Chemical Engineering,*

*Curtin University, Perth, WA 6102, Australia*

<sup>c</sup>*Faculty of Chemical and Petroleum Engineering, University of Tabriz, Tabriz, Iran*

<sup>d</sup>*Aviation Engineering Institute, Civil Aviation Flight University of China,*

*GuangHan, 618037, China*

\*Corresponding author:

sabrinachch\_123@hotmail.com (Dr.C.C. Wang)

horsefxc@szpt.edu.cn (Prof.Fan)

### **Supporting information**

**Figure S1.** Polarization (a) and impedance curves (b) for  $\text{O}_2$  reduction reaction of porous LSCF cathodes in the presence of 1 ppm  $\text{SO}_2$  at a cathodic current of 200 mA  $\text{cm}^{-2}$  for 40 hours at 800 °C.

**Figure S2.** Polarization (a) and impedance curves (b) for  $\text{O}_2$  reduction reaction of porous LSCF cathodes in the presence of 1 ppm  $\text{SO}_2$  at a cathodic current of 200 mA  $\text{cm}^{-2}$  for 40 hours at 800 °C.

**Figure S3.** Fitted impedance curve for  $\text{O}_2$  reduction reaction of porous LSCF cathodes in the presence of Fe-Cr alloy for 20 hours at 800 °C (a) 0h, (b) 20h.

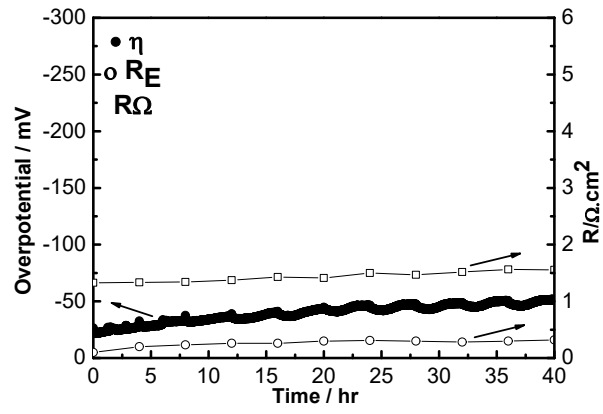

Figure S1.

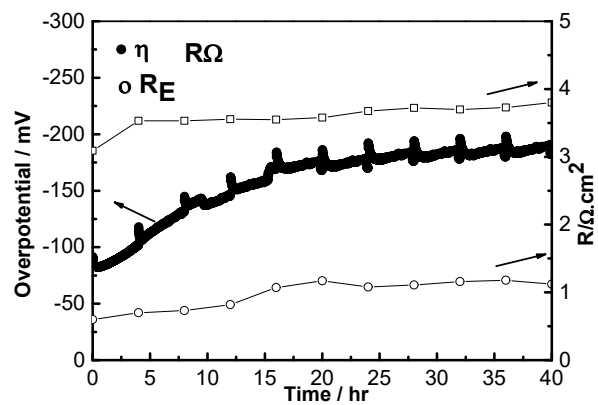

Figure S2.

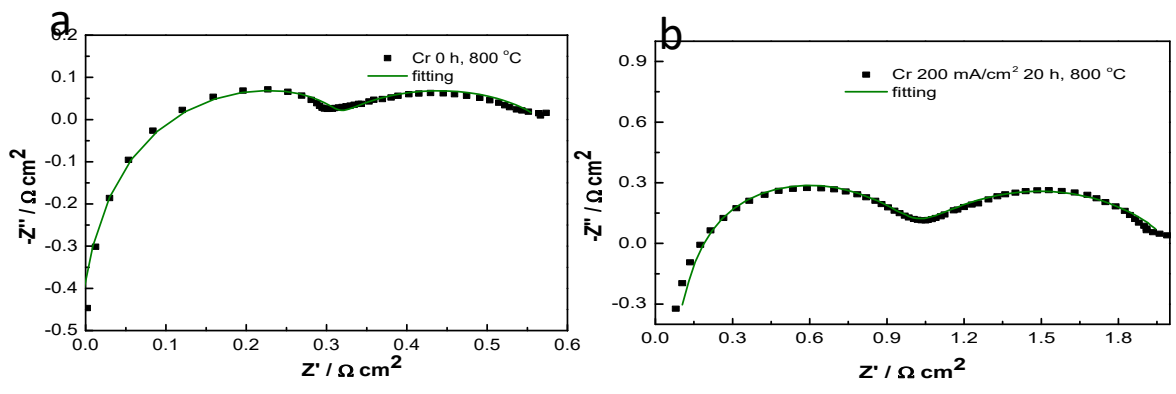

Figure S3.
